# Supplementary material
Source: PubMed Central journal article supplement (PMC3057487)
Supplement: NIHMS83771-supplement-Supplementary_Figure_1.pdf [file NIHMS83771-supplement-Supplementary_Figure_1.pdf]

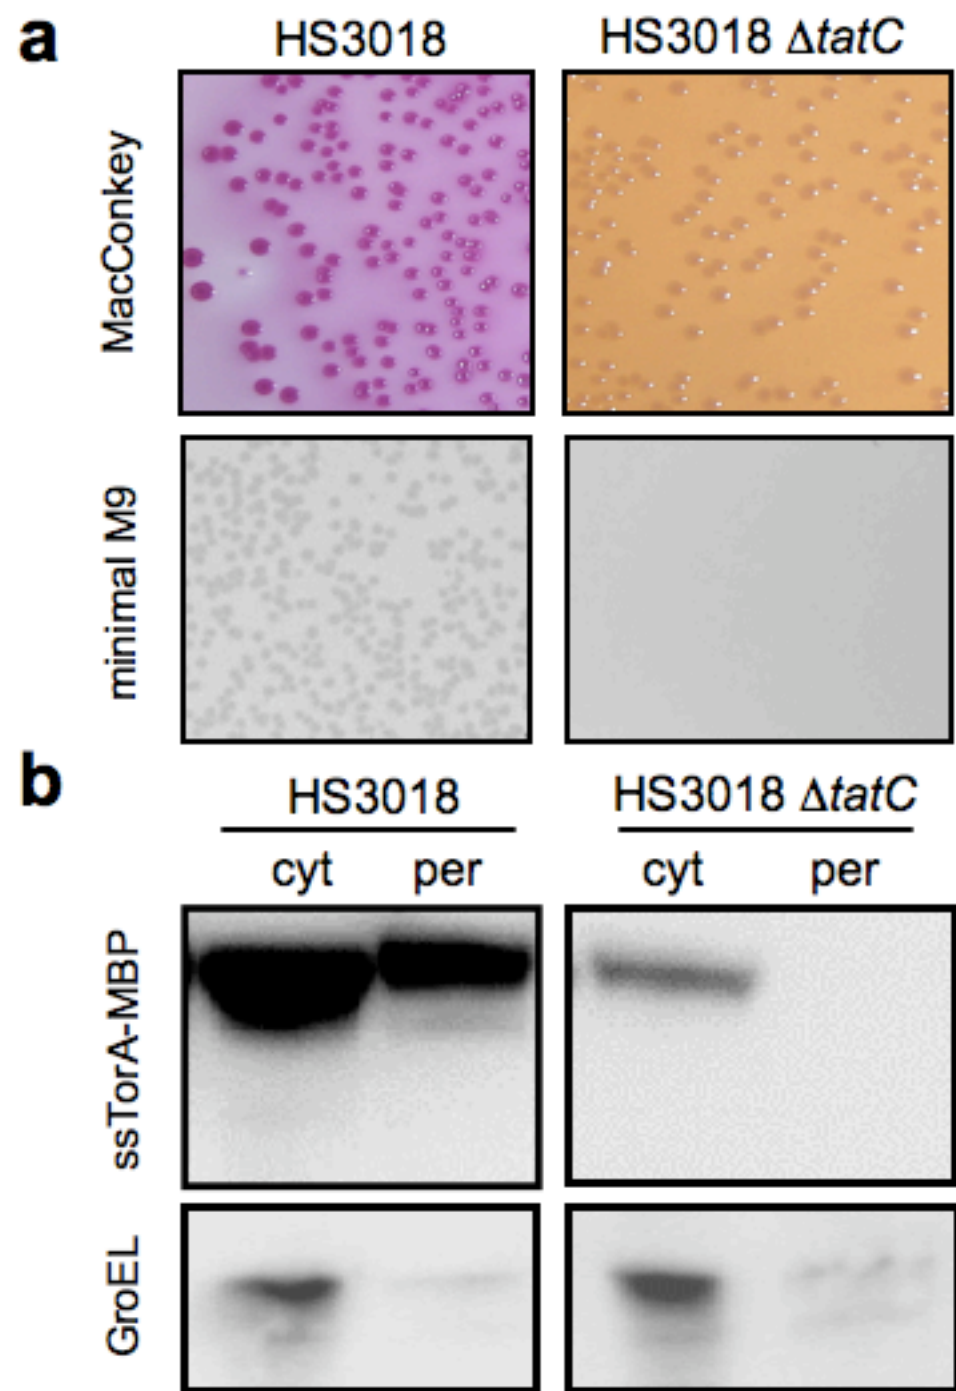

**Supplementary Figure 1.** Phenotype and intracellular localization of Tat-targeted MBP. (a) HS3018 (*malE*-negative derivative of *E. coli* MC4100) and HS3018  $\Delta$ tatC cells expressing ssTorA-MBP plated as individual colonies on MacConkey (top) and M9 minimal (bottom) agar media supplemented with 0.4% maltose. (b) Western blotting of the cytoplasmic (cyt) and periplasmic (per) lysates of the above cells probed with anti-MBP primary antibody (top). Anti-GroEL primary antibody (bottom) was also used as a control to probe the fidelity of fractionation.
